# Supplementary material for: CNN model-based image classification for canine brain MRI abnormalities
Source: Research Square preprint supplement (doi:10.21203/rs.3.rs-7537077/v1), 2025-09-11
Supplement: Supplementary file 1 [file 014a38841a071fefaa18e90e.docx]

**Supplementary Materials**

**CNN model-based image classification for canine brain MRI abnormalities**

Samira Abani 1,2*, Merlin Laue3, Peter J Dickinson4, Steven De Decker5, Rodrigo Gutierrez-Quintana6, Siavash Ghiasvand7, Sahar Tahmasebi8, Franziska Spohn1, Alexander Sabbotin1,2, Alexej Hänsch3,Jörg Janisch3, Reiner Ulrich9, Ehren McLarty4, Jasmin Nessler1, Holger Volk1,2

1 Department of Small Animal Medicine and Surgery, University of Veterinary Medicine Hannover, Hannover, Germany

2 Centre for Systems Neuroscience, University of Veterinary Medicine Hannover, Hannover, Germany

3 DOS Software-Systems, Wolfsburg, Germany

4 Department of Surgical and Radiological Sciences, School of Veterinary Medicine, Davis, California, USA

5 Department of Clinical Science and Services, Royal Veterinary College, London, United Kingdom

6 Small Animal Hospital, School of Biodiversity, One Health and Veterinary Medicine, University of Glasgow, Glasgow, United Kingdom

7 Center for Scalable Data Analytics and Artificial Intelligence (ScaDS.AI) Center for Interdisciplinary Digital Sciences (CIDS) TUD Dresden University of Technology, Dresden, Germany

8 TIB, Leibniz Information Centre for Science and Technology Hannover, Germany

9 Institute of Veterinary Pathology, Faculty of Veterinary Medicine, Leipzig University, Leipzig, Germany

*Correspondence:

Corresponding Author

samira.abani@icloud.com

**Supplementary Table 1.** Distribution of breeds in dataset

| **Breed** | **Number of dogs** | **Percentage (%)** |
| --- | --- | --- |
| Crossbreed | 86 | 15.63 |
| Labrador Retriever | 63 | 11.45 |
| Boxer | 28 | 5.09 |
| French Bulldog | 26 | 4.73 |
| German Shepherd | 19 | 3.45 |
| Golden Retriever | 18 | 3.27 |
| Cavalier King Charles Spaniel | 17 | 3.09 |
| Poodle | 16 | 2.91 |
| Border Collie | 15 | 2.73 |
| Beagle | 14 | 2.54 |
| Unavailable | 22 | 4.00 |
| Other (70 breeds) | 226 | 41.09 |

**Supplementary Table 2.** Results of global and multiple pairwise post-hoc tests with Bonferroni correction across quartiles for each T1w MRI sequence. Entries show *p*-values.

| **Test** | **T1w-tra** | **T1w-tra-gad** | **T1w-sag** | **T1w-sag-gad** | **T1w-dor** | **T1w-dor-gad** |
| --- | --- | --- | --- | --- | --- | --- |
| Global test | 0.0001 | 0.0001 | 0.0001 | 0.0001 | 0.0001 | 0.0001 |
| Q1 vs Q2 | 0.0006 | 0.0006 | 0.0006 | 0.0006 | 0.0006 | 0.0006 |
| Q1 vs Q3 | 0.0006 | 0.0006 | 0.0006 | 0.0006 | 0.0006 | 0.0006 |
| Q1 vs Q4 | 0.0006 | 0.0006 | 0.0858 | 0.1392 | 0.0006 | 0.3276 |
| Q2 vs Q3 | 0.0930 | 2.4288 | 5.4426 | 2.8992 | 0.0006 | 0.3588 |
| Q2 vs Q4 | 0.0006 | 0.0006 | 0.0006 | 0.0006 | 0.0006 | 0.0006 |
| Q3 vs Q4 | 0.0006 | 0.0006 | 0.0006 | 0.0006 | 0.0006 | 0.0006 |

**Table 3. Threshold-based performance metrics**

| Threshold | Se (%) | 95% CI | Sp (%) | 95% CI | Likelihood ratio |
| --- | --- | --- | --- | --- | --- |
| > 0.01923 | 97.14 | 85.47% - 99.85% | 0.00 | 0.00 % - 17.59% | 0.97 |
| > 0.03044 | 97.14 | 85.47% - 99.85% | 5.56 | 0.29% - 25.76% | 1.03 |
| > 0.03532 | 97.14 | 85.47% - 99.85% | 11.11 | 1.97% - 32.80% | 1.09 |
| > 0.04615 | 97.14 | 85.47% - 99.85% | 16.67 | 5.84% - 39.22% | 1.17 |
| > 0.06487 | 97.14 | 85.47% - 99.85% | 22.22 | 9.00% - 45.21% | 1.25 |
| > 0.09798 | 97.14 | 85.47% - 99.85% | 27.78 | 12.50% - 50.87% | 1.35 |
| > 0.1187 | 97.14 | 85.47% - 99.85% | 33.33 | 16.28% - 56.25% | 1.46 |
| > 0.1255 | 97.14 | 85.47% - 99.85% | 38.89 | 20.31% - 61.38% | 1.59 |
| > 0.1357 | 97.14 | 85.47% - 99.85% | 44.44 | 24.56% - 66.28% | 1.75 |
| > 0.1647 | 97.14 | 85.47% - 99.85% | 50.00 | 29.03% - 70.97% | 1.94 |
| > 0.2195 | 94.29 | 81.39% - 98.98% | 50.00 | 29.03% - 70.97% | 1.89 |
| > 0.2916 | 91.43 | 77.62% - 97.04% | 50.00 | 29.03% - 70.97% | 1.83 |
| > 0.3581 | 88.57 | 74.05% - 95.46% | 50.00 | 29.03% - 70.97% | 1.77 |
| > 0.3852 | 88.57 | 74.05% - 95.46% | 55.56 | 33.72% - 75.44% | 1.99 |
| > 0.3977 | 88.57 | 74.05% - 95.46% | 61.11 | 38.62% - 79.69% | 2.28 |
| > 0.4148 | 85.71 | 70.62% - 93.74% | 61.11 | 38.62% - 79.69% | 2.20 |
| > 0.4250 | 82.86 | 67.32% - 91.90% | 61.11 | 38.62% - 79.69% | 2.13 |
| > 0.4452 | 82.86 | 67.32% - 91.90% | 66.67 | 43.75% - 83.72% | 2.49 |
| > 0.4818 | 82.86 | 67.32% - 91.90% | 72.22 | 49.13% - 87.50% | 2.98 |
| > 0.5066 | 82.86 | 67.32% - 91.90% | 77.78 | 54.79% - 91.00% | 3.73 |
| > 0.5254 | 80.00 | 64.11% - 89.96% | 77.78 | 54.79% - 91.00% | 3.60 |
| > 0.5429 | 77.14 | 60.98% - 87.93% | 77.78 | 54.79% - 91.00% | 3.47 |
| > 0.5590 | 74.29 | 57.93% - 85.84% | 77.78 | 54.79% - 91.00% | 3.34 |
| > 0.5735 | 71.43 | 54.95% - 83.67% | 77.78 | 54.79% - 91.00% | 3.21 |
| > 0.5845 | 68.57 | 52.02% - 81.45% | 77.78 | 54.79% - 91.00% | 3.09 |
| > 0.6029 | 68.57 | 52.02% - 81.45% | 83.33 | 60.78% - 94.16% | 4.11 |
| > 0.6233 | 68.57 | 52.02% - 81.45% | 88.89 | 67.20% - 98.03% | 6.17 |
| > 0.6347 | 65.71 | 49.15% - 79.17% | 88.89 | 67.20% - 98.03% | 5.91 |
| > 0.6432 | 65.71 | 49.15% - 79.17% | 94.44 | 74.24% - 99.72% | 11.83 |
| > 0.6543 | 62.86 | 46.34% - 76.83% | 94.44 | 74.24% - 99.72% | 11.31 |
| > 0.6650 | 60.00 | 43.57% - 74.45% | 94.44 | 74.24% - 99.72% | 10.80 |
| > 0.6747 | 57.14 | 40.86% - 72.02% | 94.44 | 74.24% - 99.72% | 10.29 |
| > 0.6806 | 54.29 | 38.19% - 69.53% | 94.44 | 74.24% - 99.72% | 9.77 |
| > 0.6891 | 51.43 | 35.57% - 67.01% | 94.44 | 74.24% - 99.72% | 9.26 |
| > 0.7135 | 48.57 | 32.99% - 64.43% | 94.44 | 74.24% - 99.72% | 8.74 |
| > 0.7411 | 45.71 | 30.47% - 61.81% | 94.44 | 74.24% - 99.72% | 8.23 |
| > 0.7523 | 42.86 | 27.98% - 59.14% | 94.44 | 74.24% - 99.72% | 7.71 |
| > 0.7547 | 40.00 | 25.55% - 56.43% | 94.44 | 74.24% - 99.72% | 7.20 |
| > 0.7558 | 37.14 | 23.17% - 53.66% | 94.44 | 74.24% - 99.72% | 6.69 |
| > 0.7627 | 31.43 | 18.55% - 47.98% | 94.44 | 74.24% - 99.72% | 5.66 |
| > 0.7707 | 28.57 | 16.33% - 45.05% | 94.44 | 74.24% - 99.72% | 5.14 |

Se = Sensitivity; Sp = Specificity; CI = Confidence Interval.

**Supplementary Table 4.** Distribution of patients in test set.

| **Parameter** | **Category** | **Count** |
| --- | --- | --- |
| Breed Size | Small | 19 |
|  | Medium | 12 |
|  | Large | 22 |
| Breed Category | Non-brachycephalic | 40 |
|  | Brachycephalic | 13 |
| Sex | Male | 32 |
|  | Female | 21 |
| Diagnosis | MRI-normal | 18 |
|  | Neoplastic | 22 |
|  | Inflammatory | 12 |
|  | Other causes | 1 |
| Institute | TiHo | 19 |
|  | UC Davis | 17 |
|  | RVC | 11 |
|  | Glasgow | 6 |

**Supplementary figure legends**

**Supplementary Figure 1.** Normal Q–Q plot comparing the empirical quantiles of the data with the theoretical quantiles of a normal distribution. Data are shown separately for patients classified as normal (blue) and abnormal (pink), both of which exhibit mild deviations from normality at the distributional extremes.

**Supplementary Figure 2.** NormalQ-Q plot of the standardized residuals based on van der Waerden scores from the ANCOVA. The plot shows a minor deviation from normality. The model was retained, but its results were interpreted with caution.

**Supplementary Figure 3.** NormalQ-Q plot of the standardized residuals based on van der Waerden scores from the two-way ANOVA of accuracy by diagnosis and institute, confirming approximate normality.

**Supplementary Figure 4.** Residual plot for linear regression of accuracy by weight, stratified by breed size (yellow = small, pink = medium, green = large). The residuals are symmetrically distributed around the zero line with few outliers, showing a fair agreement with a linear model.

**Supplementary Figure 5.** Individual effects of categorical factors on CNN accuracy with corresponding Q-Q plots of standardised residuals based on van der Waerden scores. **(a)** Institution significantly affected accuracy, with TiHo cases showing higher accuracy than RVC and Glasgow (Kruskal-Wallis, p ≤ 0.001). **(b)** Q-Q plots of standardised residuals for (a). **(c)** Manufacturer has no significant effect on accuracy (Kruskal-Wallis, p = 0.119). **(d)** Q-Q plots of standardised residuals for (c). **(e)** Scanner model had a significant effect, with Achieva showing higher accuracy than Intera and Magnetom Essenza (Kruskal-Wallis, p = 0.003). **(f)** Q-Q plots of standardised residuals for (e). **(g)** Scanner field strength significantly influenced accuracy, with 3 T datasets showing higher accuracy than 1.5 T datasets (t-test, p < 0.001). **(h)** Q-Q plots of standardised residuals for (g). **(i)** Breed size has no significant effect on accuracy (ANOVA, p = 0.400). **(j)** Q-Q plots of standardised residuals for (i). **(k)** Skull conformation has no significant effect on accuracy (independent t-test, p = 0.374). **(l)** Q-Q plots of standardised residuals for (k). **(m)** Sex has no significant effect on accuracy (t-test, p = 0.815). **(n)** Q-Q plots of standardised residuals for (m). **(o)** Diagnosis has no significant effect on accuracy (Kruskal-Wallis, p = 0.848). **(p)** Q-Q plots of standardised residuals for (o).

**Supplementary Figure 6.** Individual effects of continuous factors on CNN accuracy with corresponding residual plots. **(a)** Number of sequences is significantly and linearly correlated with accuracy (p = 0.003, R² = 0.162). **(b)** Residual plot for (a). **(c)** Number of slices is significantly and linearly correlated with accuracy (p < 0.001, R² = 0.222). **(d)** Residual plot for (c). **(e)** Weight at MRI has no significant linear correlation with accuracy (p = 0.839, R² = 0.001). **(f)** Residual plot for (e). **(g)** Age at MRI has no significant linear correlation with accuracy (p = 0.853, R² = 0.001). **(h)** Residual plot for (g).
